# Supplementary material
Source: publisher site journal article supplement (https://www.spandidos-publications.com/6095/downloadSupplementary)

Figure S1. Knockdown of PTX3 severely impairs EGF-induced chemotaxis of breast cancer cells. Chemotaxis assay of MDA-MB-231 and MCF7 cells (magnification, x200). PTX3, pentraxin 3; EGF, epidermal growth factor; shPTX3, PTX3 stable knockdown; Scr, scrambled siRNA.

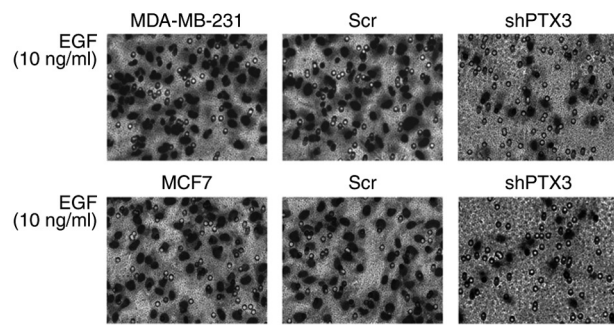

Supplement: Supplementary file 1 [file downloadSupplementary]
